# Supplementary material for: Efficacy and safety of lifileucel, a one-time autologous tumor-infiltrating lymphocyte (TIL) cell therapy, in patients with advanced melanoma after progression on immune checkpoint inhibitors and targeted therapies: pooled analysis of consecutive cohorts of the C-144-01 study
Source: PubMed Central journal article supplement — J Immunother Cancer. 2022 Dec 13;10(12):e005755. doi: 10.1136/jitc-2022-005755 (PMC9748991; doi:10.1136/jitc-2022-005755), 2022-12-13
Supplement: jitc-2022-005755supp002.pdf [file jitc-2022-005755supp002.pdf]

# Efficacy and safety of lifileucel, a one-time autologous tumor-infiltrating lymphocyte (TIL) cell therapy in patients with advanced melanoma after progression on immune checkpoint inhibitors and targeted therapies: Pooled analysis of consecutive cohorts of the C-144-01 study

**Authors:** Jason Chesney, Karl D. Lewis, Harriet Kluger, Omid Hamid, Eric Whitman, Sajeve Thomas, Martin Wermke, Mike Cusnir, Evidio Domingo-Musibay, Giao Q. Phan, John M. Kirkwood, Jessica C. Hassel, Marlana Orloff, James Larkin, Jeffrey Weber, Andrew J. S. Furness, Nikhil I. Khushalani, Theresa Medina, Michael E. Egger, Friedrich Graf Finckenstein, Madan Jagasia, Parameswaran Hari, Giri Sulur, Wen Shi, Xiao Wu, Amod Sarnaik (corresponding author)

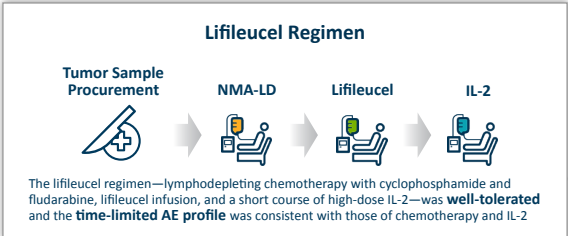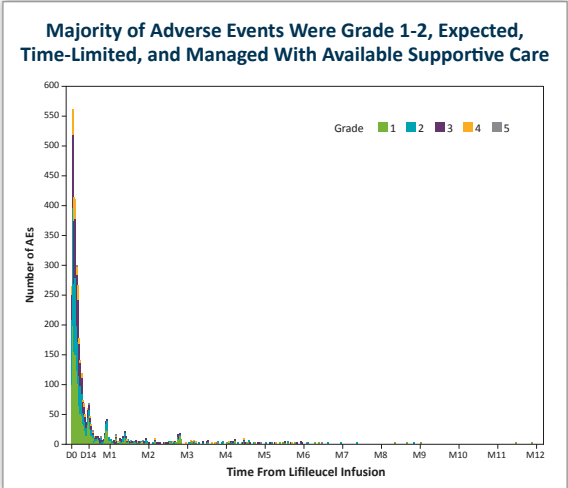

**LIFILEUCEL:  
AN INVESTIGATIONAL  
TIL CELL THERAPY**

- Manufactured using TIL recovered from a patient's tumor using a 22-day centralized manufacturing process
- One-time treatment with lifileucel resulted in a 31% ORR (IRC-assessed) and median DOR not reached
- The safety profile was expected, manageable, and time-limited

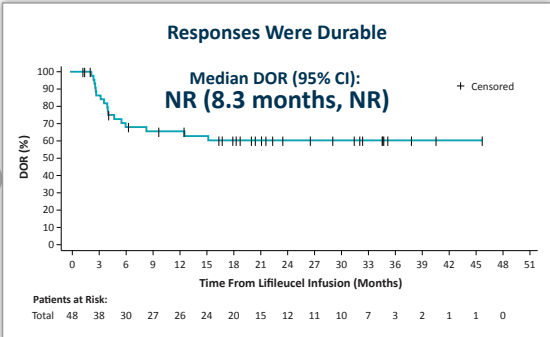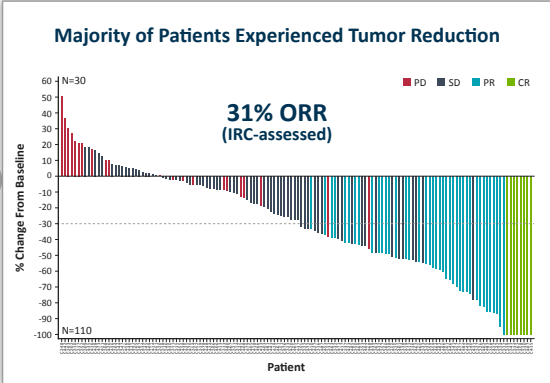

**Investigational lifileucel TIL cell therapy is an important potential treatment option for patients whose disease has progressed on/after ICI and appropriate targeted therapy**

AE, adverse event; CR, complete response; DOR, duration of response; ICI, immune checkpoint inhibitors; IL-2, interleukin-2; IRC, independent review committee; NMA-LD, nonmyeloablative lymphodepletion; ORR, objective response rate; OS, overall survival; PD, progressive disease; PR, partial response; SD, stable disease; SOD, sum of diameters.
